# Supplementary material
Source: PubMed Central journal article supplement (PMC31109)
Supplement: pnas_071045698_1.pdf [file pnas_071045698_1.pdf]

**Supplemental Table 2.** Model basalt-seawater reaction parameters

| $T(^{\circ}\text{C})$                                                                                                                     | <i>in Situ</i>          |                      |      | STP                     |      |
|-------------------------------------------------------------------------------------------------------------------------------------------|-------------------------|----------------------|------|-------------------------|------|
|                                                                                                                                           | $\log(f_{\text{CO}_2})$ | $\log(\text{TCO}_2)$ | pH   | $\log(f_{\text{CO}_2})$ | pH   |
| Reaction 1: Leonhardite + albite + $\text{CO}_2 = \text{calcite} + \text{paragonite} + 4 \text{ quartz} + 2.5 \text{ H}_2\text{O}$        |                         |                      |      |                         |      |
| 25                                                                                                                                        | -5.48                   | -2.78                | 9.69 | -5.48                   | 9.69 |
| 50                                                                                                                                        | -4.43                   | -2.75                | 9.06 | -5.18                   | 9.53 |
| 75                                                                                                                                        | -3.53                   | -2.71                | 8.52 | -4.78                   | 9.31 |
| 100                                                                                                                                       | -2.78                   | -2.67                | 8.05 | -4.46                   | 9.12 |
| 125                                                                                                                                       | -2.13                   | -2.64                | 7.63 | -4.14                   | 8.92 |
| 150                                                                                                                                       | -1.57                   | -2.59                | 7.25 | -3.74                   | 8.64 |
| 175                                                                                                                                       | -1.08                   | -2.51                | 6.93 | -2.64                   | 7.7  |
| 200                                                                                                                                       | -0.66                   | -2.37                | 6.67 | -1.39                   | 6.48 |
| 225                                                                                                                                       | -0.29                   | -2.15                | 6.47 | -0.87                   | 5.95 |
| 250                                                                                                                                       | 0.04                    | -1.87                | 6.34 | -0.45                   | 5.54 |
| Reaction 2: Leonhardite + $\text{CO}_2 = \text{calcite} + \text{kaolinite} + 2 \text{ quartz} + 1.5 \text{ H}_2\text{O}$                  |                         |                      |      |                         |      |
| 25                                                                                                                                        | -5.43                   | -2.78                | 9.67 | -5.43                   | 9.67 |
| 50                                                                                                                                        | -4.29                   | -2.73                | 8.98 | -4.97                   | 9.42 |
| 75                                                                                                                                        | -3.32                   | -2.67                | 8.39 | -4.43                   | 9.11 |
| 100                                                                                                                                       | -2.49                   | -2.61                | 7.85 | -3.95                   | 8.79 |
| 125                                                                                                                                       | -1.76                   | -2.56                | 7.35 | -3.4                    | 8.38 |
| 150                                                                                                                                       | -1.14                   | -2.48                | 6.9  | -2.09                   | 7.17 |
| 175                                                                                                                                       | -0.58                   | -2.31                | 6.5  | -1.22                   | 6.3  |
| 200                                                                                                                                       | -0.10                   | -2.03                | 6.18 | -0.67                   | 5.76 |
| 225                                                                                                                                       | 0.33                    | -1.66                | 5.93 | -0.2                    | 5.28 |
| 250                                                                                                                                       | 0.71                    | -1.28                | 5.79 | 0.23                    | 4.86 |
| Reaction 3: Clinocllore-14A + 5 calcite + 5 $\text{CO}_2 = 5 \text{ dolomite} + \text{kaolinite} + 2 \text{ H}_2\text{O} + \text{quartz}$ |                         |                      |      |                         |      |
| 25                                                                                                                                        | -4.41                   | -2.67                | 9.09 | -4.41                   | 9.09 |
| 50                                                                                                                                        | -3.39                   | -2.61                | 8.41 | -3.88                   | 8.74 |
| 75                                                                                                                                        | -2.52                   | -2.56                | 7.81 | -3.39                   | 8.36 |
| 100                                                                                                                                       | -1.78                   | -2.52                | 7.27 | -2.76                   | 7.82 |
| 125                                                                                                                                       | -1.13                   | -2.45                | 6.79 | -1.79                   | 6.87 |
| 150                                                                                                                                       | -0.56                   | -2.29                | 6.37 | -1.16                   | 6.24 |
| 175                                                                                                                                       | -0.05                   | -2                   | 6.01 | -0.63                   | 5.72 |
| 200                                                                                                                                       | 0.40                    | -1.63                | 5.72 | -0.16                   | 5.24 |
| 225                                                                                                                                       | 0.80                    | -1.26                | 5.52 | 0.28                    | 4.81 |
| 250                                                                                                                                       | 1.16                    | -0.84                | 5.44 | 0.68                    | 4.41 |
| Reaction 4: Clinocllore-14A + 5 $\text{CO}_2 = 5 \text{ magnesite} + \text{kaolinite} + \text{quartz} + 2 \text{ H}_2\text{O}$            |                         |                      |      |                         |      |
| 25                                                                                                                                        | -2.78                   | -2.52                | 7.83 | -2.78                   | 7.83 |
| 50                                                                                                                                        | -1.90                   | -2.48                | 7.12 | -2.18                   | 7.25 |
| 75                                                                                                                                        | -1.15                   | -2.41                | 6.53 | -1.55                   | 6.63 |
| 100                                                                                                                                       | -0.51                   | -2.22                | 6.05 | -1.01                   | 6.09 |
| 125                                                                                                                                       | 0.05                    | -1.91                | 5.64 | -0.5                    | 5.59 |
| 150                                                                                                                                       | 0.54                    | -1.53                | 5.3  | -0.04                   | 5.12 |
| 175                                                                                                                                       | 0.98                    | -1.11                | 5.04 | 0.4                     | 4.69 |
| 200                                                                                                                                       | 1.36                    | -0.73                | 4.89 | 0.8                     | 4.3  |
| 225                                                                                                                                       | 1.71                    | -0.35                | 4.83 | 1.19                    | 3.93 |
| 250                                                                                                                                       | 2.02                    | 0.01                 | 4.85 | 1.54                    | 3.61 |
| Reaction 5: Daphnite-14A + 5 $\text{CO}_2 = 5 \text{ siderite} + \text{kaolinite} + \text{quartz} + 2 \text{ H}_2\text{O}$                |                         |                      |      |                         |      |
| 25                                                                                                                                        | -2.05                   | -2.47                | 7.13 | -2.05                   | 7.13 |
| 50                                                                                                                                        | -1.28                   | -2.4                 | 6.51 | -1.52                   | 6.61 |
| 75                                                                                                                                        | -0.62                   | -2.23                | 6    | -1.01                   | 6.1  |
| 100                                                                                                                                       | -0.05                   | -1.94                | 5.59 | -0.55                   | 5.63 |
| 125                                                                                                                                       | 0.44                    | -1.59                | 5.26 | -0.11                   | 5.2  |
| 150                                                                                                                                       | 0.88                    | -1.21                | 4.98 | 0.3                     | 4.79 |
| 175                                                                                                                                       | 1.26                    | -0.84                | 4.8  | 0.68                    | 4.41 |
| 200                                                                                                                                       | 1.60                    | -0.49                | 4.71 | 1.05                    | 4.06 |
| 225                                                                                                                                       | 1.91                    | -0.15                | 4.7  | 1.38                    | 3.75 |
| 250                                                                                                                                       | 2.19                    | 0.18                 | 4.74 | 1.71                    | 3.47 |
| Reaction 6: 2 Albite + $\text{CO}_2 + 3 \text{ H}_2\text{O} = \text{thermonatrite} + \text{kaolinite} + 4 \text{ quartz}$                 |                         |                      |      |                         |      |
| 25                                                                                                                                        | 3.92                    |                      |      |                         |      |
| 50                                                                                                                                        | 4.85                    |                      |      |                         |      |
| 75                                                                                                                                        | 5.68                    |                      |      |                         |      |
| 100                                                                                                                                       | 6.42                    |                      |      |                         |      |
| 125                                                                                                                                       | 7.08                    |                      |      |                         |      |
| 150                                                                                                                                       | 7.67                    |                      |      |                         |      |
| 175                                                                                                                                       | 8.21                    |                      |      |                         |      |
| 200                                                                                                                                       | 8.71                    |                      |      |                         |      |
| 225                                                                                                                                       | 9.15                    |                      |      |                         |      |
| 250                                                                                                                                       | 9.56                    |                      |      |                         |      |
| Reaction 7: 3 Paragonite + $\text{CO}_2 + 5 \text{ H}_2\text{O} = \text{thermonatrite} + 3 \text{ kaolinite}$                             |                         |                      |      |                         |      |
| 25                                                                                                                                        | 4.02                    |                      |      |                         |      |
| 50                                                                                                                                        | 5.12                    |                      |      |                         |      |
| 75                                                                                                                                        | 6.11                    |                      |      |                         |      |
| 100                                                                                                                                       | 7.00                    |                      |      |                         |      |
| 125                                                                                                                                       | 7.80                    |                      |      |                         |      |
| 150                                                                                                                                       | 8.53                    |                      |      |                         |      |
| 175                                                                                                                                       | 9.20                    |                      |      |                         |      |
| 200                                                                                                                                       | 9.82                    |                      |      |                         |      |
| 225                                                                                                                                       | 10.39                   |                      |      |                         |      |
| 250                                                                                                                                       | 10.91                   |                      |      |                         |      |

STP, Quenched fluid at standard temperature, 25<sup>0</sup>C, and pressure, 1 bar.
